# Supplementary material
Source: Springer Nature journal article supplement (https://www.springermedizin.de/resource/supplementary/13063_2012_1259_MOESM1_ESM.pdf/9620508)
Supplement: MOESM1 [file 9620508]

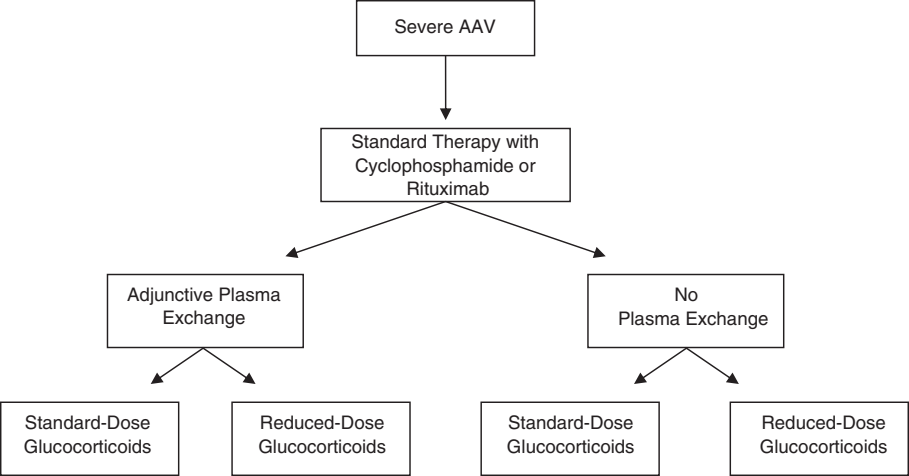

Severe AAV

Standard Therapy with  
Cyclophosphamide or  
Rituximab

Adjunctive Plasma  
Exchange

No  
Plasma Exchange

Standard-Dose  
Glucocorticoids

Reduced-Dose  
Glucocorticoids

Standard-Dose  
Glucocorticoids

Reduced-Dose  
Glucocorticoids
